# Supplementary material for: A novel ionic AIE smart responsive material with multiple structural transformations
Source: Royal Society of Chemistry journal article supplement (doi:10.1039/d1ra03090f), 2021-01-01
Supplement: d1ra03090f1.pdf [file d1ra03090f1.pdf]

**Supporting information**

**A novel ionic AIE smart responsive material with multiple structural transformations**

Zixuan Xu,<sup>†a</sup> Linhan Su,<sup>†b</sup> Xiaofen Chen,<sup>a</sup> Ying Yang\*<sup>a</sup>

*Key Laboratory of Nonferrous Metals Chemistry and Resources Utilization of Gansu Province,  
College of Chemistry and Chemical Engineering, Lanzhou University, Lanzhou 730000, Gansu, P.  
R. China. E-mail: [yangying@lzu.edu.cn](mailto:yangying@lzu.edu.cn)*

*The 940th Hospital of Joint Logistics Support Force of Chinese PLA, Lanzhou, 730050, Gansu, P.  
R. China.*

## Experimental Section

### materials and method

Zn-dust, TiCl<sub>4</sub>, diphenylmethanone, 4,4-dimethylbenzophenone were brought from Aldrich. N-Methylimidazole was obtained from Shanghai Weite Chemical Reagent Co., Ltd. N-bromosuccinimide was brought from Wuhan Pengo Technology., Ltd. AIBN was brought from Energy Chemical (China). All other chemicals were analytical grade reagents.

The <sup>1</sup>H NMR and <sup>13</sup>C NMR spectra of samples were obtained by using an INVOA 400 MHz spectrometer, High-resolution Mass spectrum (HRMS) was recorded using a Thermo Scientific Orbitrap Elite mass spectrometer. IR spectra (400–4000 cm<sup>-1</sup>) were recorded on a Shimadzu IR Prestige-21 FT-IR. Spectrophotometer UV/Vis experiments were performed with a Shimadzu UV-2550 spectrometer, Fluorescence spectra were recorded by Edinburgh FLSP920. Temperature-dependent X-ray diffraction (XRD) were recorded by D8 ADVANCE

The HepG2 cells were grown in DMEM (Dulbecco's Modified Eagle's Medium) supplemented with 10% FBS (fetal bovine serum), 2 mM of glutamine, penicillin (100 units/mL), and streptomycin (100 units/mL) at 37 °C. They were treated with [TPE-Dim-DMe]<sup>2+</sup>[Br]<sub>2</sub><sup>2-</sup> (0.5mM) in culture media for 30 min at room temperature. Without any washing procedure, the cells were stained by [TPE-Dim-DMe]<sup>2+</sup>[Br]<sub>2</sub><sup>2-</sup>. The bright field and fluorescence images were acquired with Olympus laser scanning confocal microscope (FV3000).

#### 4,4'-(2,2-diphenylethene-1,1-diyl)bis(methylbenzene) (1)

Diphenylmethanone (3 g, 14.27 mmol), 4,4-dimethylbenzophenone (2.6 g, 14.27 mmol) and a Zn-dust (2.8 g, 42.81 mmol) were added into a 250 mL double-neck flask under N<sub>2</sub> atmosphere, 100 mL THF was added in the flask, then TiCl<sub>4</sub> (5 mL) was added dropwise at -10 °C, The mixture was stirred at room temperature for 10 min and refluxed at 85 °C for 12h further. After cooling, THF was evaporated in vacuo and the crude product was extracted with dichloromethane, the organic phase was wash with water and dried with MgSO<sub>4</sub>. Then Silica-gel column

purification (n-hexane was used as eluent) solution afforded white 4,4'-(2,2-diphenylethene-1,1-diyl)bis(methylbenzene) powder with 80 % reaction yield. <sup>1</sup>H NMR (CDCl<sub>3</sub>, δ, ppm) 7.14-7.06 (m, 6H), 7.05-6.99 (m, 4H), 6.89 (dd, *J*=21.08 Hz, 8H), 2.24 (s, 6H).

4,4'-(2,2-diphenylethene-1,1-diyl)bis((bromomethyl)benzene) (**2**)

Compound **1** (1.5 g, 4.16 mmol), NBS (1.48 g, 8.33 mmol) and AIBN (30 mg) were refluxed in CCl<sub>4</sub> under N<sub>2</sub> atmosphere for 12 h. After cooling and filtering, the filtrate was evaporated and purified by column chromatography (n-hexane: CH<sub>2</sub>Cl<sub>2</sub> = 6:1 solution was used as eluent). Yield, 50%. <sup>1</sup>H NMR (CDCl<sub>3</sub>, δ, ppm) 7.16-7.06 (m, 10H), 7.03-6.94 (m, 8H), 4.40 (s, 4H).

[TPE-Dim-DMe] (Br)<sub>2</sub>

Compound **2** (0.2 g, 0.38 mmol), 1-methylimidazole (0.073 mL, 0.926 mmol) and 20 mL acetonitrile were added into a 100 mL flask with stirrer. The mixture was stirred at 78 °C for 12 h. After cooling of the reaction, acetonitrile was evaporated to dryness under reduced pressure. The crude was washed with cold methanol and dried in vacuo. Yield, 92%. <sup>1</sup>H NMR (CDCl<sub>3</sub>, δ, ppm) 9.26 (s, 2H), 7.71 (d, *J* = 1.5 Hz, 4H), 7.16 (d, *J* = 8.2 Hz, 4H), 7.08 (dd, *J* = 8.8, 4.0 Hz, 6H), 6.98 – 6.89 (m, 8H), 5.33 (s, 4H), 3.82 (s, 6H). <sup>13</sup>C NMR (101 MHz, ) δ 143.80 (s), 143.28 (s), 139.63 (s), 137.27 (s), 133.63 (s), 131.60 (s), 131.04 (s), 128.45 (s), 128.17 (s), 127.35 (s), 124.58 (s), 122.81 (s), 51.88 (s), 36.45 (s). ESI-MS: calcd. for [TPE-Dim-DMe]<sup>2+</sup>, 261.1385; found, 213.1386.

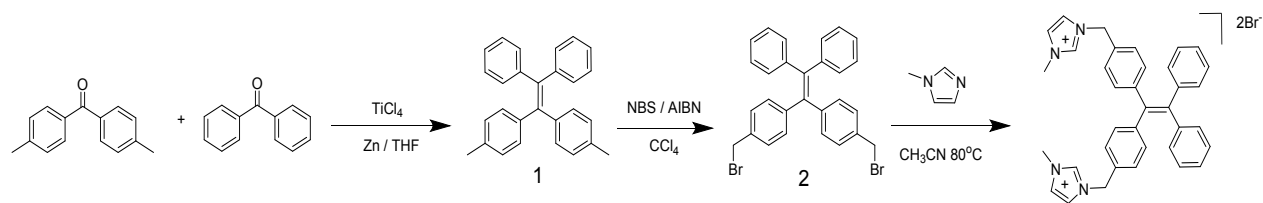

**Scheme S1** Synthesis of [TPE-Dim-DMe] (Br)<sub>2</sub>.

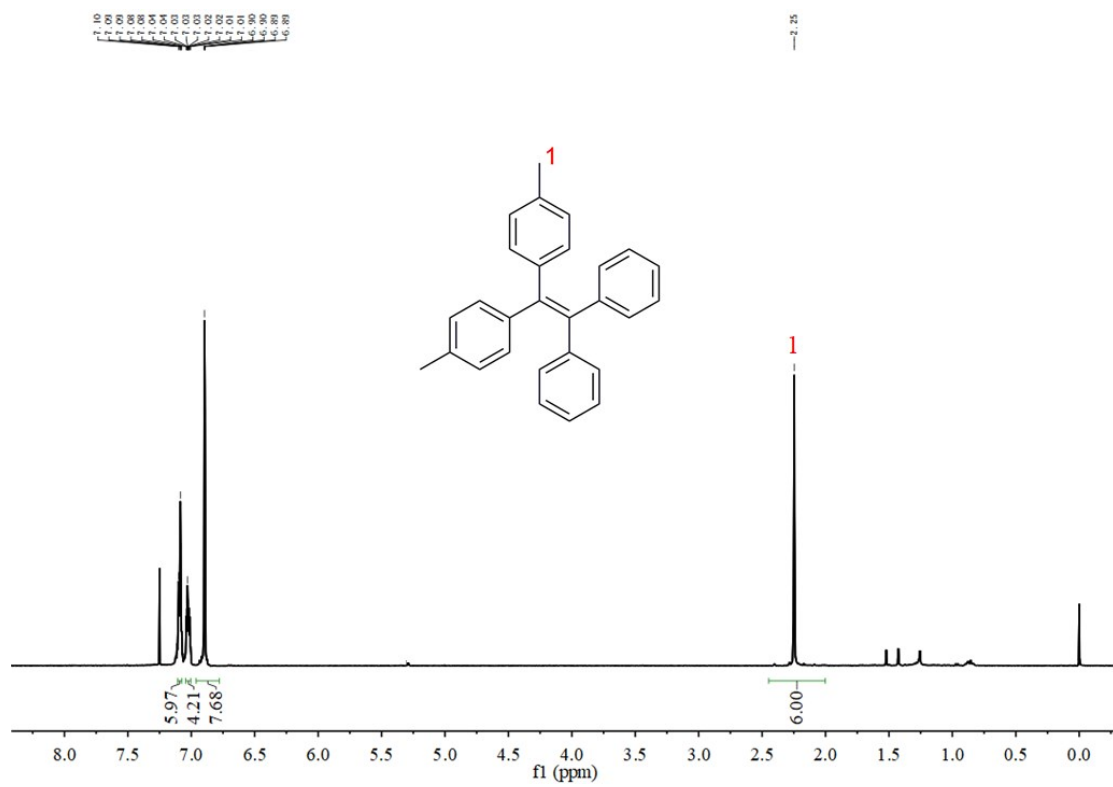

Figure S1. <sup>1</sup>H NMR spectra (400MHz, CDCl<sub>3</sub>) of 1

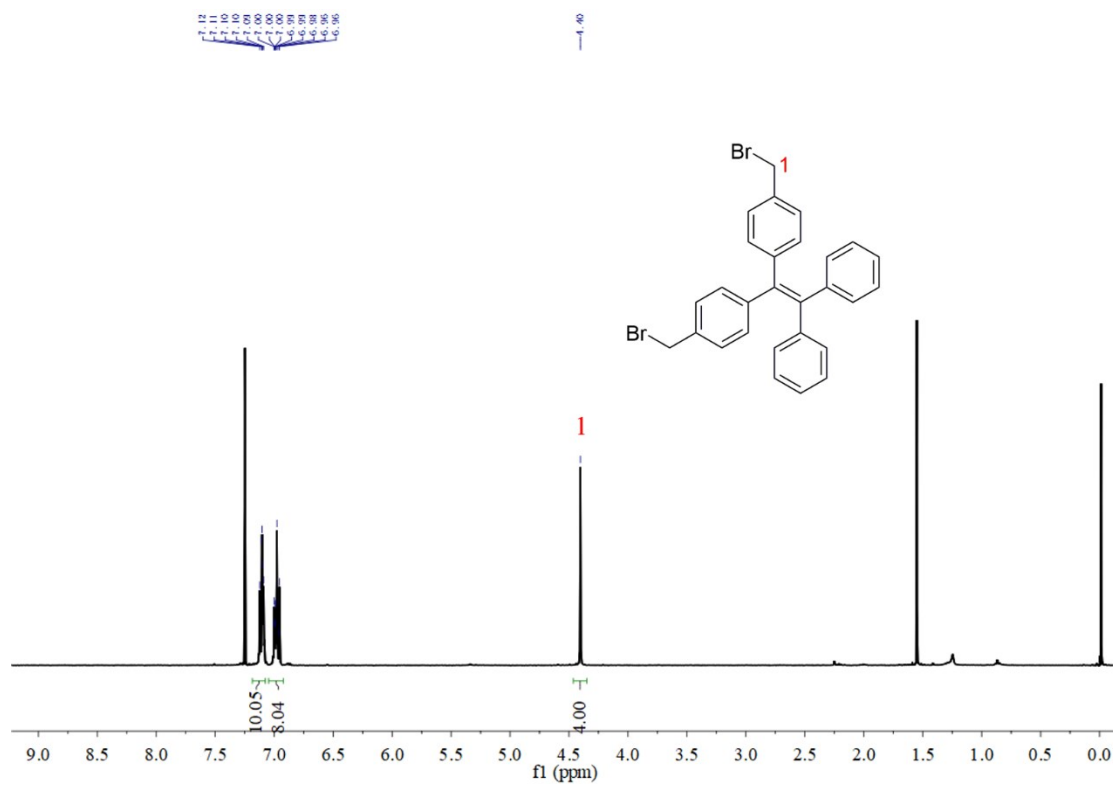

**Figure S2.** <sup>1</sup>H NMR spectra (400 MHz, CDCl<sub>3</sub>) of **2**

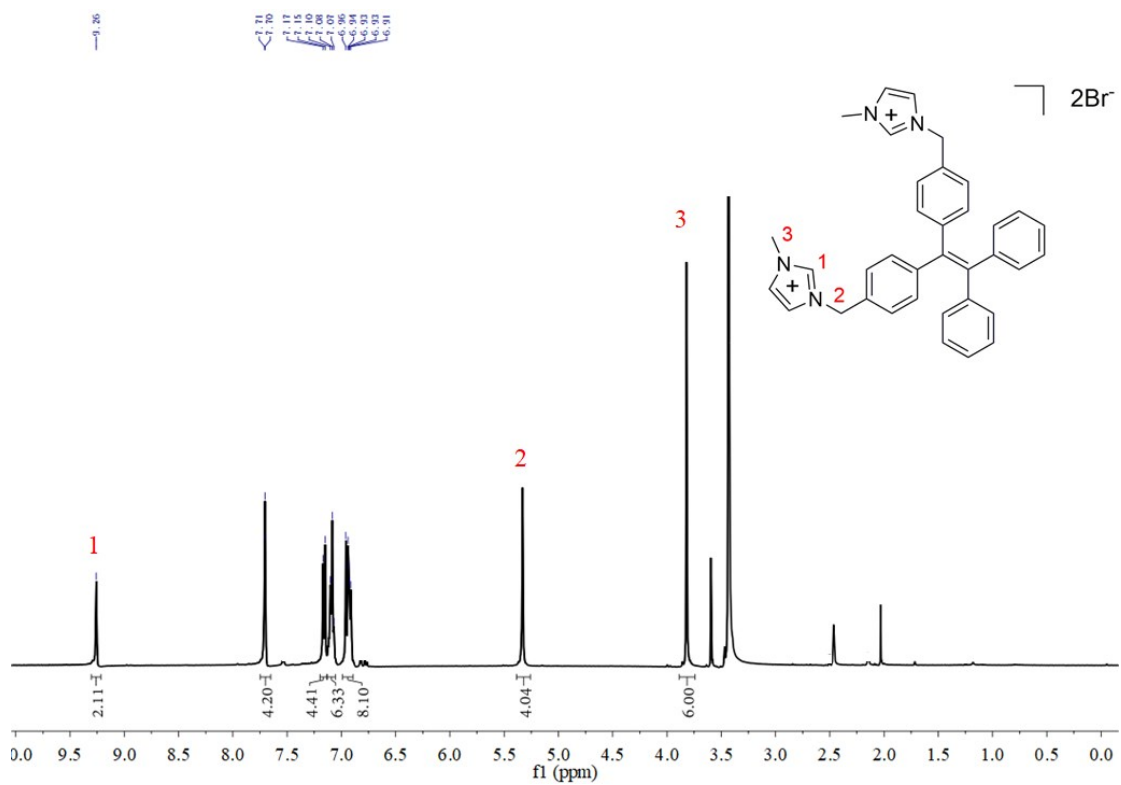

**Figure S3.**  $^1\text{H}$  NMR spectra (400 MHz,  $\text{DMSO-}d_6$ ) of  $[\text{TPE-Dim-DMe}](\text{Br})_2$

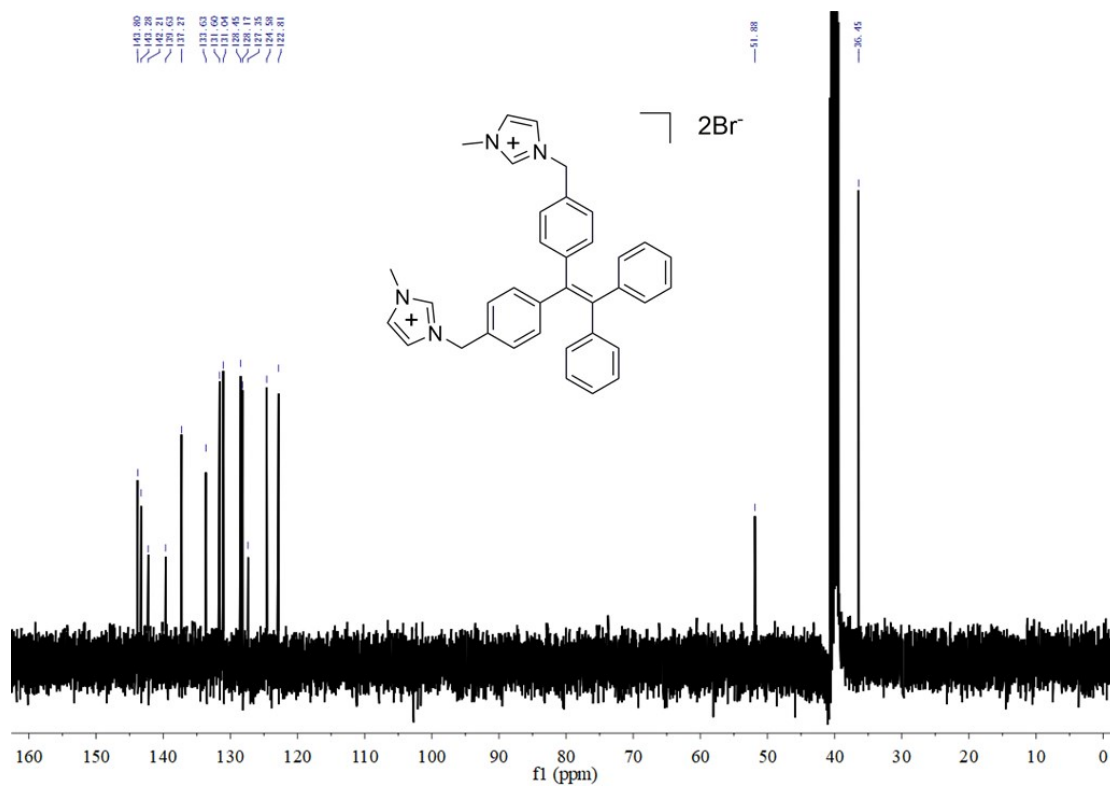

Figure S4.  $^{13}\text{C}$  NMR spectra (100 MHz,  $\text{DMSO-}d_6$ ) of  $[\text{TPE-Dim-DMe}]^{2+}(\text{Br})_2$



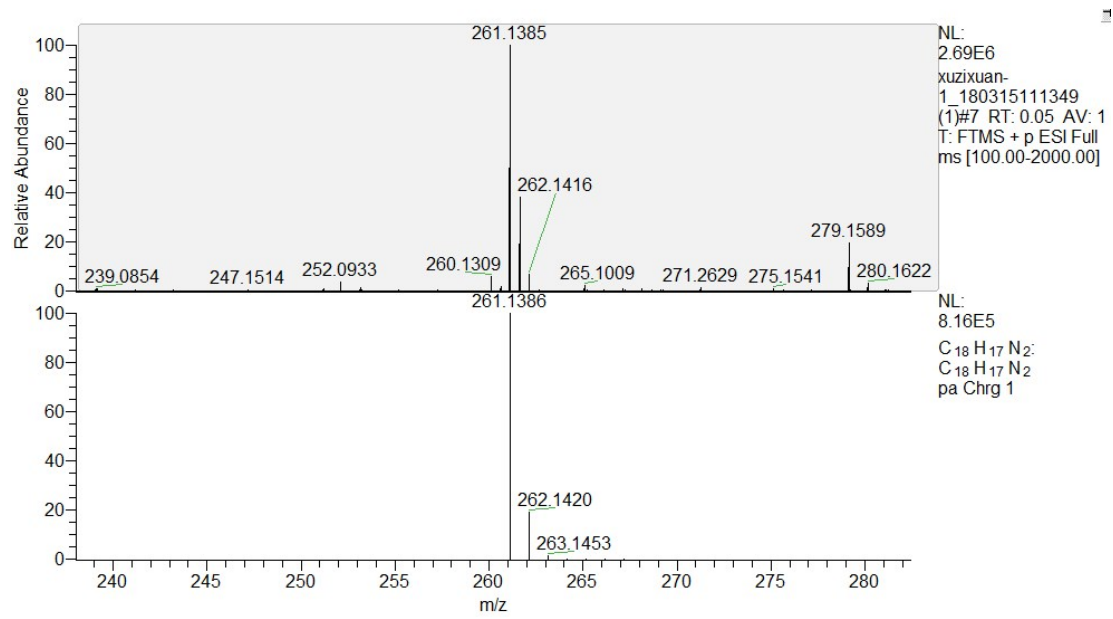

Figure S5. HR-ESI-MS of [TPE-Dim-DMe] (Br)<sub>2</sub>.

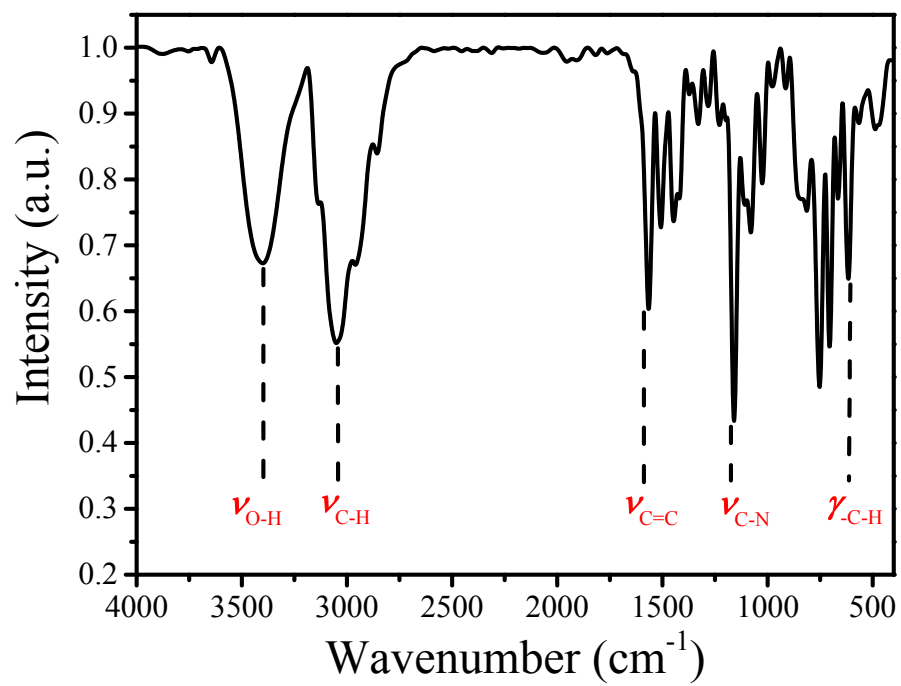

**Figure S6.** The FT-IR spectra of [TPE-Dim-DMe] (Br)<sub>2</sub>

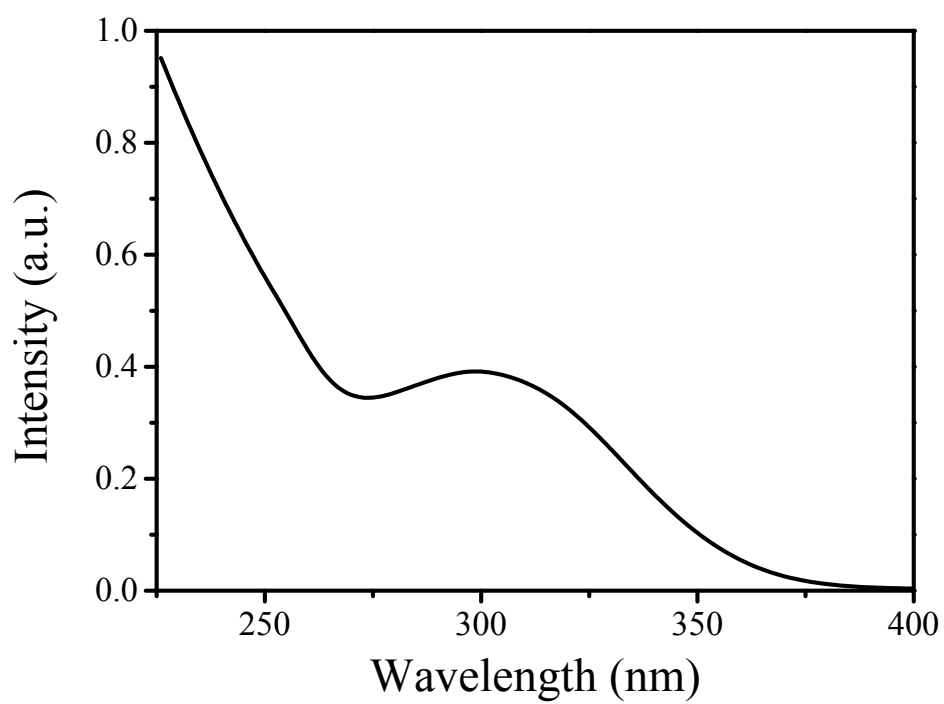

**Fig S7.** The UV-vis absorption spectra of [TPE-Dim-DMe] (Br)<sub>2</sub> (10  $\mu$ M) in CH<sub>3</sub>CN

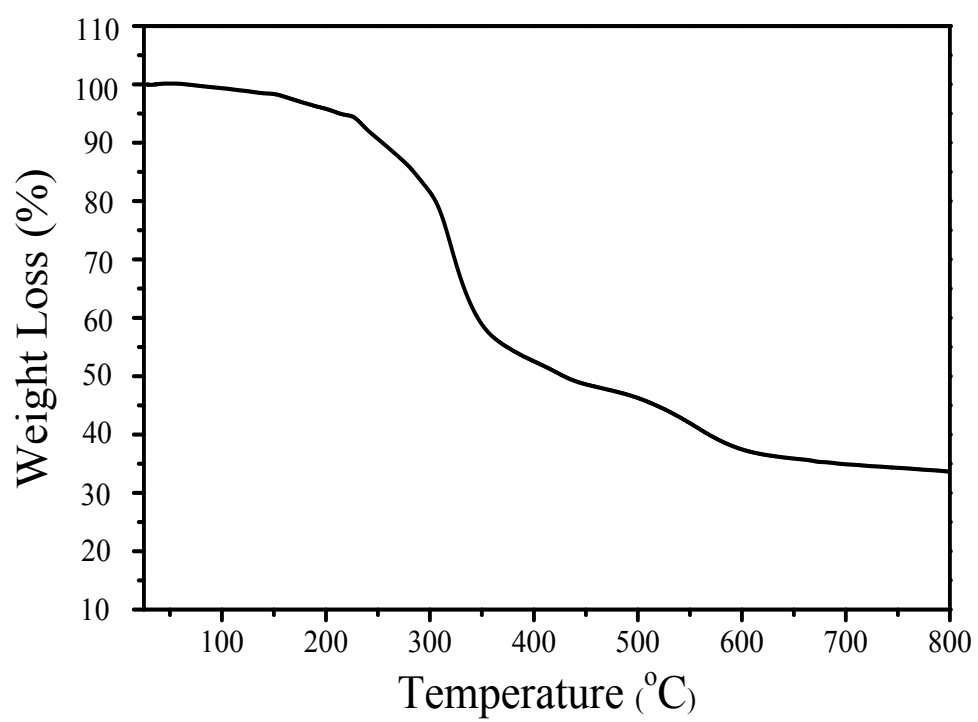

**Fig S8.** Thermo-gravimetric analyses (TGA) of [TPE-Dim-DMe] (Br)<sub>2</sub>

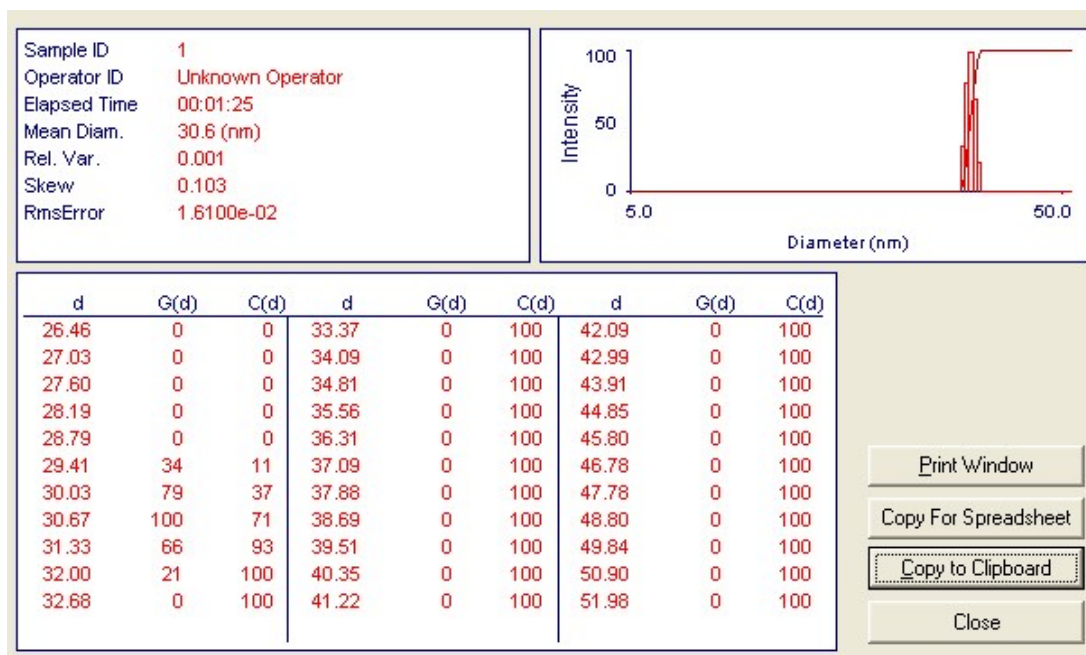

**Fig S9.** DLS of [TPE-Dim-DMe] (Br)<sub>2</sub> (0.5 mM) in water

**Table S1** Crystallographic data for [TPE-Dim-DMe] (Br)<sub>2</sub><sup>-</sup>

---

| Crystal data and structure refinement for [TPE-Dim-DMe] <sup>2+</sup> [Br] <sub>2</sub> <sup>2-</sup> |                                                                                |               |
|-------------------------------------------------------------------------------------------------------|--------------------------------------------------------------------------------|---------------|
| Identification code                                                                                   | [TPE-Dim-DMe] <sup>2+</sup> [Br] <sub>2</sub> <sup>2-</sup> ·2H <sub>2</sub> O |               |
| Empirical formula                                                                                     | C <sub>36</sub> H <sub>34</sub> Br <sub>2</sub> N <sub>4</sub>                 |               |
| Formula weight                                                                                        | 718.50                                                                         |               |
| Temperature                                                                                           | 293 K                                                                          |               |
| Wavelength                                                                                            | 1.54184 Å                                                                      |               |
| Crystal system                                                                                        | monoclinic                                                                     |               |
| Space group                                                                                           | P 21/c                                                                         |               |
| Unit cell dimensions                                                                                  | a=8.30793(16)                                                                  |               |
|                                                                                                       | b=15.8271(3)                                                                   | α = 90 °      |
|                                                                                                       | c=25.9265(7)                                                                   | β=92.478 °(2) |
| Volume                                                                                                | 3405.9(13)                                                                     | γ = 90 °      |
| Z                                                                                                     | 4                                                                              |               |
| Density (calculated)                                                                                  | 1.844 Mg/m <sup>3</sup>                                                        |               |
| Absorption coefficient                                                                                | 5.845 mm <sup>-1</sup>                                                         |               |
| F (000)                                                                                               | 1472.0                                                                         |               |
| Crystal size                                                                                          | 0.16×0.14×0.12 mm <sup>3</sup>                                                 |               |
| The range for data collection                                                                         | 5.31 to 69.4°                                                                  |               |
| Index ranges                                                                                          | -5 ≤ h ≤ 9, -18 ≤ k ≤ 17, -30 ≤ l ≤ 30                                         |               |
| Reflections collected                                                                                 | 13185                                                                          |               |
| Independent reflections                                                                               | 5976 (R <sub>int</sub> = 0.0286)                                               |               |
| Completeness to theta=66.97                                                                           | 99.87                                                                          |               |
| Absorption correction                                                                                 | multi-scan                                                                     |               |
| Refinement method                                                                                     | Full-matrix least-squares on F <sup>2</sup>                                    |               |
| Data / restraints / parameters                                                                        | /0/415                                                                         |               |
| Goodness-of-fit on F <sup>2</sup>                                                                     | 1.181                                                                          |               |
| Final R indices [I > 2σ(I)]                                                                           | R1=0.0725, wR2=0.1750                                                          |               |
| R indices (all data)                                                                                  | R1=0.0785, wR2=0.1770                                                          |               |

---

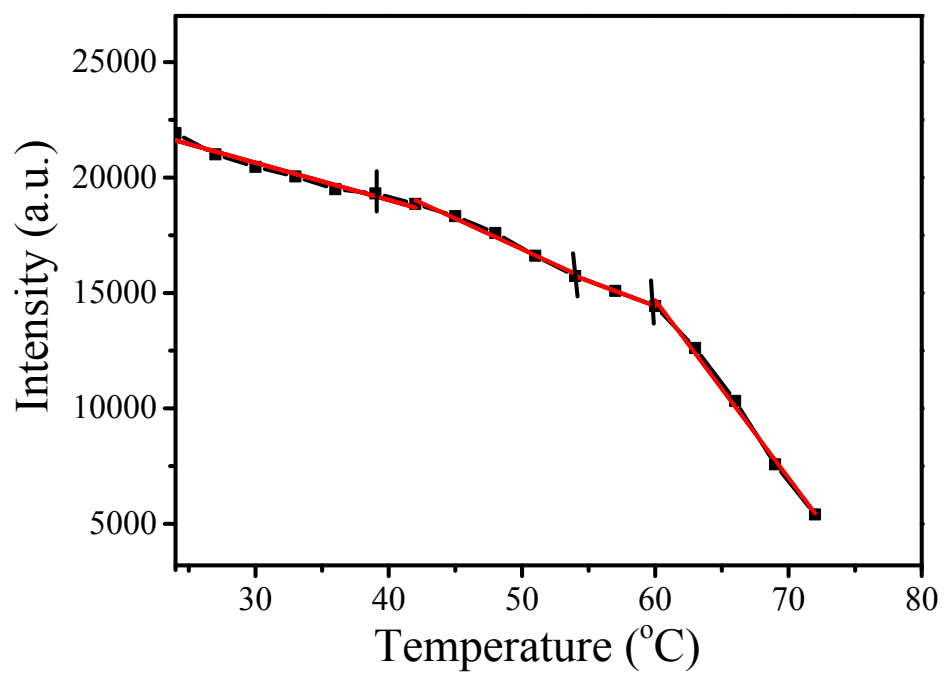

**Fig S10.** The effect of the temperatures on fluorescent intensity of [TPE-Dim-DMe] (Br)<sub>2</sub> crystal.

**Table S2** The data of linear relationship between temperatures and fluorescent intensity of [TPE-Dim-DMe] (Br)<sub>2</sub> crystal.

| <b>24- 42 °C</b>        |              |             |                |
|-------------------------|--------------|-------------|----------------|
| Equation                | y = a + b*x  |             |                |
| Weight                  | No Weighting |             |                |
| Residual Sum of Squares | 231343       |             |                |
| Pearson's r             | -0.98285     |             |                |
| Adj. R-Square           | 0.9592       |             |                |
|                         |              | Value       | Standard Error |
| Book1_B                 | Intercept    | 25485.5     | 454.4846       |
| Book1_B                 | Slope        | -161.5      | 13.55011       |
| <b>42-56 °C</b>         |              |             |                |
| Equation                | y = a + b*x  |             |                |
| Weight                  | No Weighting |             |                |
| Residual Sum of Squares | 77145.9      |             |                |
| Pearson's r             | -0.99397     |             |                |
| Adj. R-Square           | 0.98397      |             |                |
|                         |              | Value       | Standard Error |
| Book1_B                 | Intercept    | 30165.6     | 814.52731      |
| Book1_B                 | Slope        | -265.43333  | 16.90342       |
| <b>56-60 °C</b>         |              |             |                |
| Equation                | y = a + b*x  |             |                |
| Weight                  | No Weighting |             |                |
| Residual Sum of Squares | 112.66667    |             |                |
| Pearson's r             | -0.99993     |             |                |
| Adj. R-Square           | 0.99973      |             |                |
|                         |              | Value       | Standard Error |
| Book1_B                 | Intercept    | 27415.33333 | 142.73713      |
| Book1_B                 | Slope        | -216.33333  | 2.50185        |
| <b>60-72 °C</b>         |              |             |                |
| Equation                | y = a + b*x  |             |                |



---

|                         |              |          |                |
|-------------------------|--------------|----------|----------------|
| Weight                  | No Weighting |          |                |
| Residual Sum of Squares | 225198.679   |          |                |
| Pearson's r             | -0.99789     |          |                |
| Adj. R-Square           | 0.99439      |          |                |
|                         |              | Value    | Standard Error |
| Book1_B                 | Intercept    | 60871.84 | 1910.03105     |
| Book1 B                 | Slope        | -769.71  | 28.88026       |

---

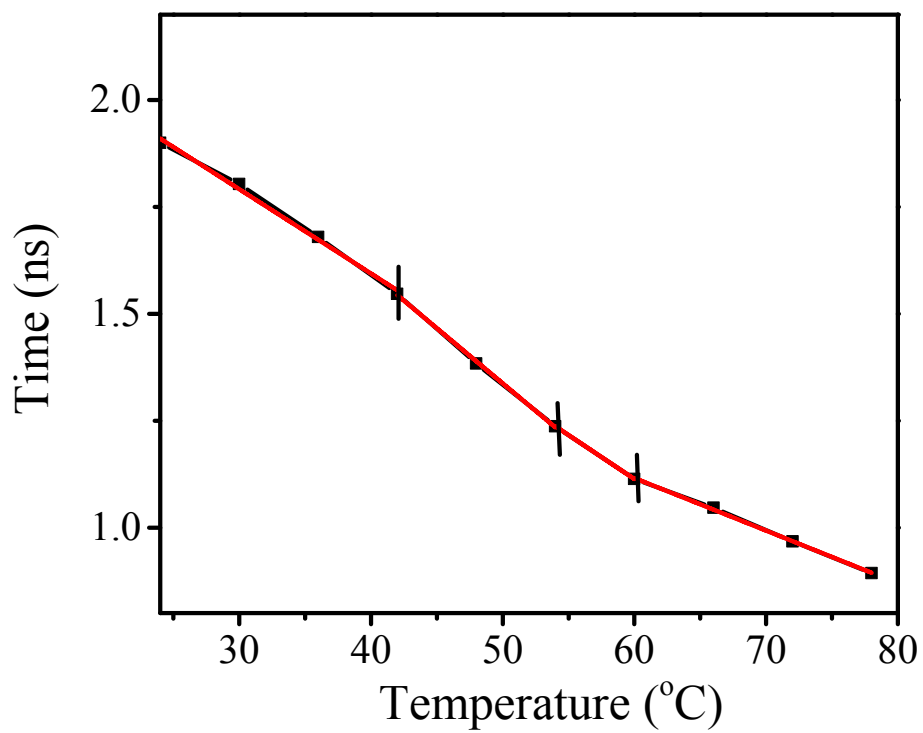

**Fig S11.** The effect of the temperatures on PL decay time of [TPE-Dim-DMe] (Br)<sub>2</sub> crystal.

**Table S3** The data of linear relationship between temperatures and PL decay time of [TPE-

**Dim-DMe] (Br)<sub>2</sub> crystal.**

---

**24- 42 °C**

|                         |                     |          |                |
|-------------------------|---------------------|----------|----------------|
| Equation                | $y = a + b \cdot x$ |          |                |
| Weight                  | No Weighting        |          |                |
| Residual Sum of Squares | 3.53352E-4          |          |                |
| Pearson's r             | -0.99749            |          |                |
| Adj. R-Square           | 0.99247             |          |                |
|                         |                     | Value    | Standard Error |
| B                       | Intercept           | 2.38342  | 0.03336        |
| B                       | Slope               | -0.01972 | 9.90724E-4     |

**42-56 °C**

|                         |                     |         |                |
|-------------------------|---------------------|---------|----------------|
| Equation                | $y = a + b \cdot x$ |         |                |
| Weight                  | No Weighting        |         |                |
| Residual Sum of Squares | 4.81667E-5          |         |                |
| Pearson's r             | -0.9995             |         |                |
| Adj. R-Square           | 0.99799             |         |                |
|                         |                     | Value   | Standard Error |
| B                       | Intercept           | 2.62747 | 0.03946        |
| B                       | Slope               | -0.0258 | 8.17913E-4     |

**56-60 °C**

|                         |                     |         |                |
|-------------------------|---------------------|---------|----------------|
| Equation                | $y = a + b \cdot x$ |         |                |
| Weight                  | No Weighting        |         |                |
| Residual Sum of Squares | 0                   |         |                |
| Pearson's r             | -1                  |         |                |
| Adj. R-Square           | --                  |         |                |
|                         |                     | Value   | Standard Error |
| B                       | Intercept           | 2.34923 | --             |
| B                       | Slope               | -0.0206 | --             |

**60-78 °C**

---

---

|                         |                     |          |                |
|-------------------------|---------------------|----------|----------------|
| Equation                | $y = a + b \cdot x$ |          |                |
| Weight                  | No Weighting        |          |                |
| Residual Sum of Squares | 2.34411E-5          |          |                |
| Pearson's r             | -0.99957            |          |                |
| Adj. R-Square           | 0.99871             |          |                |
|                         |                     | Value    | Standard Error |
| B                       | Intercept           | 1.85428  | 0.01769        |
| B                       | Slope               | -0.01231 | 2.55175E-4     |

---
